# Supplementary material
Source: publisher figshare collection journal article supplement (https://frontiersin.figshare.com/ndownloader/files/12981611)
Supplement: Supplementary file 1 [file 12981611]

| Element   | DKC2 concentrations (mg/kg) |     |     | Background reference material concentrations (mg/kg) |                          |                            | Mean $I_{geo}$ values for DKC2            |                                        |                                           |
|-----------|-----------------------------|-----|-----|------------------------------------------------------|--------------------------|----------------------------|-------------------------------------------|----------------------------------------|-------------------------------------------|
|           | Mean                        | Min | Max | urban soil                                           | National soil background | National crustal abundance | $I_{geo}$ Merseyside soils mean (maximum) | $I_{geo}$ national soil mean (maximum) | $I_{geo}$ national crustal mean (maximum) |
| <b>Ba</b> | 104                         | 50  | 164 | 342                                                  | 316                      | 600                        | -2.30<br>(-1.65)                          | -2.19<br>(-1.53)                       | -3.11<br>(-2.46)                          |
| <b>Cu</b> | 71                          | 32  | 105 | 37.52                                                | 24                       | 15                         | 0.34<br>(0.90)                            | 0.98<br>(1.54)                         | 1.66<br>(2.22)                            |
| <b>Pb</b> | 125                         | 51  | 178 | 83                                                   | 81                       | 15                         | 0.01<br>(0.52)                            | 0.04<br>(0.55)                         | 2.47<br>(2.98)                            |
| <b>Zn</b> | 379                         | 56  | 913 | 85                                                   | 91                       | 70                         | 1.57<br>(2.84)                            | 1.47<br>(2.74)                         | 1.85<br>(3.12)                            |

**Supplementary Table 7:** Mean, maximum and minimum geochemical concentrations (mg/kg) measured in DKC2 for elements identified as anthropogenically derived (Supplementary Figure 10, Supplementary Tables 3 and 4). Corresponding background mean concentrations (mg/kg) for urban soils in Merseyside, national soils and crustal abundance (Rawlins et al., 2012) are also presented from which geo-accumulation index ( $I_{geo}$ ) values were determined (Muller, 1969). Extent of anthropogenic contamination is indicated by  $I_{geo}$  values:  $< 0$ : uncontaminated;  $0 \leq 1$ : low to moderate contamination;  $1 \leq 2$ : moderately contaminated;  $2 \leq 3$ : moderately to heavily contaminated;  $3 \leq 4$ : heavily contaminated;  $4 \leq 5$  heavily to extremely contaminated; and  $>5$ : extremely contaminated (Muller, 1969).
